# Supplementary material for: Combination of Electroacupuncture and Grafted Mesenchymal Stem Cells Overexpressing TrkC Improves Remyelination and Function in Demyelinated Spinal Cord of Rats
Source: PubMed Central journal article supplement (PMC5390924; doi:10.1038/srep09133), 2015-03-16
Supplement: srep09133-s1.pdf [file srep09133-s1.pdf]

# Combination of Electroacupuncture and Grafted Mesenchymal Stem Cells Overexpressing TrkC Improves Remyelination and Function in Demyelinated Spinal Cord of Rats

Ying Ding<sup>a#</sup>, Rong-Yi Zhang<sup>a#</sup>, Bing He<sup>a#</sup>, Zhou Liu<sup>a</sup>, Ke Zhang<sup>a</sup>, Jing-Wen Ruan<sup>e\*</sup>, Eng-Ang Ling<sup>f</sup>, Jin-Lang Wu<sup>g</sup>, Yuan-Shan Zeng<sup>a,b,c,d,\*</sup>

<sup>a</sup>Department of Histology and Embryology, Zhongshan School of Medicine, Sun Yat-sen University, Guangzhou, Guangdong 510080, China

<sup>b</sup>Key Laboratory for Stem Cells and Tissue Engineering Ministry of Education, Sun Yat-sen University, Guangzhou, Guangdong 510080, China

<sup>c</sup>Institute of Spinal Cord Injury, Sun Yat-sen University, Guangzhou, Guangdong 510127, China

<sup>d</sup>Co-innovation Center of Neuroregeneration, University, Nantong, Nantong, Jiangsu 226011, China

<sup>e</sup>Department of Acupuncture, the 1st Affiliated Hospital, Sun Yat-sen University, Guangzhou, Guangdong 510080, China

<sup>f</sup>Department of Anatomy, Yong Loo Lin School of Medicine, National University of Singapore, Singapore 117597, Singapore

<sup>g</sup>Department of Electron Microscope, Zhongshan School of Medicine, Sun Yat-sen University, Guangzhou, Guangdong 510080, China

# These authors contributed equally to this manuscript

\* Corresponding Authors:

Yuan-Shan Zeng, M.D., Ph.D.  
Department of Histology and Embryology

Zhongshan School of Medicine

Sun Yat-sen University

74# Zhongshan 2<sup>nd</sup> Road

Guangzhou 510080, China

Tel: +86-20-87332698

Fax: +86-20-87332698

E-mail address: [zengysh@mail.sysu.edu.cn](mailto:zengysh@mail.sysu.edu.cn)

or

Jing-Wen Ruan, M.D.

Department of Acupuncture

The 1st Affiliated Hospital

Sun Yat-sen University

58# Zhongshan 2<sup>nd</sup> Road

Guangzhou 510080, China

Tel: +86-20-87755766-8390

E-mail address: [ruanjw@163.com](mailto:ruanjw@163.com)

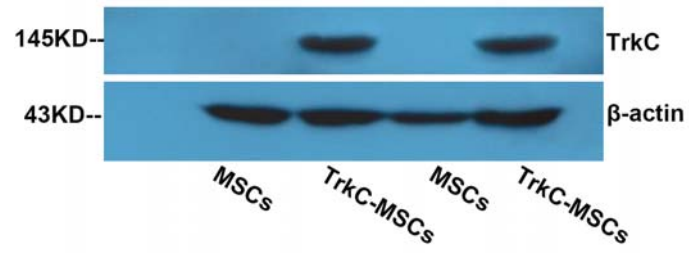

**Supplementary Figure 1** | Western blot analysis of TrkC expression in cultured MSCs and Ad-TrkC transduced MSCs. Samples were run twice in the independent experiment and the experiments were repeated three times under the same experimental conditions.  $\beta$ -actin was used as a control.

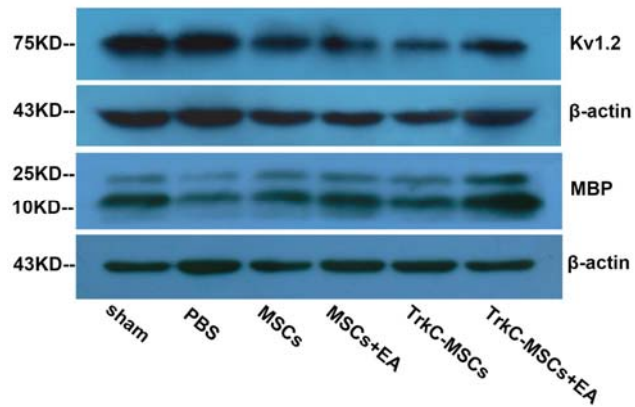

**Supplementary Figure 2** | Western blot analysis of Kv1.2 and MBP expression in the sham, PBS, MSCs, MSCs+EA, TrkC-MSCs and TrkC-MSCs+EA groups. Samples were run five times in the 6 groups and the experiments were repeated twice under the same experimental conditions.  $\beta$ -actin was used as a control.

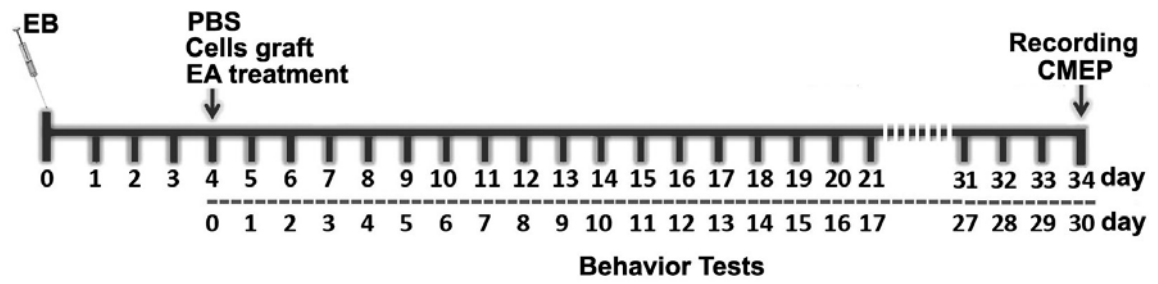

**Supplementary Figure 3** | Illustrating the time points of EB injection, PBS injection, cells graft, behavior tests and recording CMEP.

**Supplementary Table 1** Application of animals in different experimental procedures

| Different experimental procedures                                                                                     | Number of rats in each group |     |      |          |           |               |
|-----------------------------------------------------------------------------------------------------------------------|------------------------------|-----|------|----------|-----------|---------------|
|                                                                                                                       | sham                         | PBS | MSCs | MSCs +EA | TrkC-MSCs | TrkC-MSCs +EA |
| ELISA                                                                                                                 | 5                            | 5   | 5    | 5        | 5         | 5             |
| Western blot                                                                                                          | 5                            | 5   | 5    | 5        | 5         | 5             |
| Behavioural testing;<br>CMEPs recording;<br>Differentiation of<br>MSCs;<br>Myelin counting and<br>electron microscopy | 5                            | 5   | 5    | 5        | 5         | 5             |
| Longitudinal sections<br>were used to NF/Kv1.2<br>/MBP triple-label<br>immunofluorescence<br>staining.                | 3                            | 3   | 3    | 3        | 3         | 3             |
| Immunoelectron<br>microscope                                                                                          | 0                            | 0   | 0    | 0        | 0         | 3             |
| Total                                                                                                                 | 18                           | 18  | 18   | 18       | 18        | 21            |
